# Supplementary material for: Novel crystalline supramolecular assemblies of amorphous polypyrrole nanoparticles through surfactant templatingElectronic supplementary information (ESI) available: FT-IR spectrum and the peak assignment of PPy nanoparticles. See http://www.rsc.org/suppdata/cc/b2/b207744m/
Source: Royal Society of Chemistry journal article supplement (doi:10.1039/b207744m), 2002-08-30
Supplement: b207744m.doc [file b207744m.doc]

# Supplementary Information for:

# Novel crystalline supramolecular assemblies of amorphous polypyrrole nanoparticles through surfactant templating

Jyongsik Jang*, Joon Hak Oh

*Hyperstructured Organic Materials Research Center and School of Chemical Engineering, Seoul National University, Shinlimdong 56-1, Seoul 151-742, Korea.*

1. FT-IR spectrum of polypyrrole nanoparticles prepared using 0.44 M OTAB at 3oC.


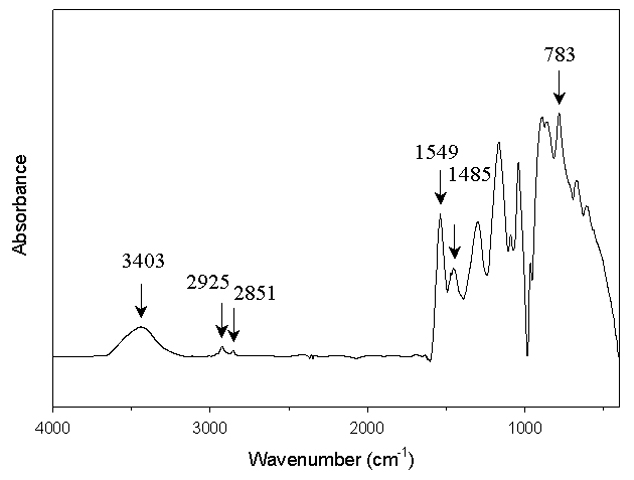


The FT-IR spectral baseline of conducting materials has a tendency to tilt owing to plasma reflection phenomenon.1 Since the PPy is a good conducting material, the baseline is slanted. On that spectrum, baseline was corrected as multiple point level. The peak observed at 1549 cm1 is due to five-membered ring stretching and free CN stretching vibrations. The band at 1485 cm1 is attributed to conjugated CN stretching vibration. The broad band at 3403 cm1 is due to hydrogen bonded NH stretching vibration. The small peaks at 2925 and 2851 cm1 originate from five-membered ring CH stretching vibration. CH wagging vibration was observed at 783 cm1.

Reference

1. H. S. Nalwa, *Handbook of Organic Conductive Molecules and Polymers*,1st ed.; John Wiley & Sons, Chichester, England, 1997, Vol. 4, Chapter 9.
